# Supplementary material for: A binuclear Fe(iii)/quinizarin complex as a structural model for anthracycline drugs binding to iron
Source: Royal Society of Chemistry journal article supplement (doi:10.1039/d1nj04087a), 2022-01-01
Supplement: d1nj04087a1.pdf [file d1nj04087a1.pdf]

## A binuclear Fe(III)/quinizarin complex as a structural model for anthracycline drugs binding to iron

Authors: Juliana S. do Nascimento<sup>a</sup>, Aurideia P. de Sousa<sup>a</sup>, Ana C. S. Gondim<sup>a</sup>, Eduardo H. S. Sousa<sup>a</sup>, Edson H. Teixeira<sup>b</sup>, Luiz Gonzaga do Nascimento Neto<sup>b</sup>, Beatriz Pinheiro Bezerra<sup>c</sup>, Alejandro Pedro Ayala<sup>c</sup>, Alzir A. Batista<sup>d</sup>, Igor F. Vasconcelos<sup>e</sup>, Francisco G. S. Oliveira<sup>e</sup> and Alda K. M. Holanda<sup>a\*</sup>

a. Laboratório de Bioinorgânica, Departamento de Química Orgânica e Inorgânica, Universidade Federal do Ceará, PO Box 12200, Campus do Pici s/n, 60440-900, Fortaleza - CE, Brazil,

b. Laboratório Integrado de Biomoléculas, Departamento de Patologia e Medicina Legal, Universidade Federal do Ceará, CEP 60430-270, Fortaleza - CE, Brazil.

c. Department of Physics, Federal University of Ceara, Fortaleza, CE, Brazil

d. Departamento de Química, Universidade Federal de São Carlos, PO Box 676, 13565-905 São Carlos, SP, Brazil

e. Departamento de Engenharia Metalúrgica e de Materiais, Centro de Tecnologia, Universidade Federal do Ceará, Campus do Pici, Bloco 729, 60440-900, Fortaleza, CE, Brazil

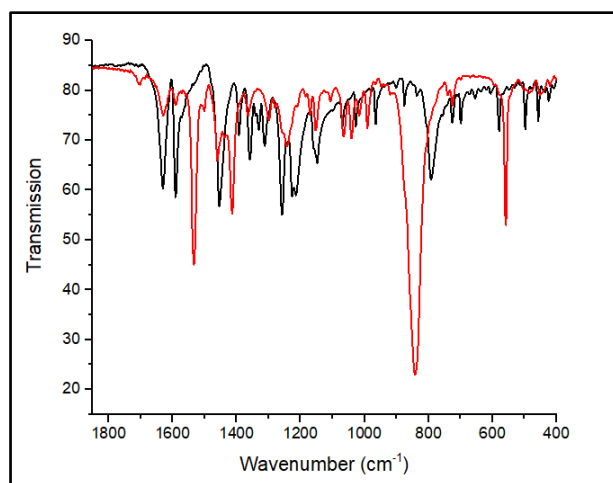

**Fig. S1** Infrared spectra of the free Quinizarin (black line) and [(Fe(cyclam))<sub>2</sub>Qz]Cl(PF<sub>6</sub>)<sub>3</sub> (red line) in KBr pellets.

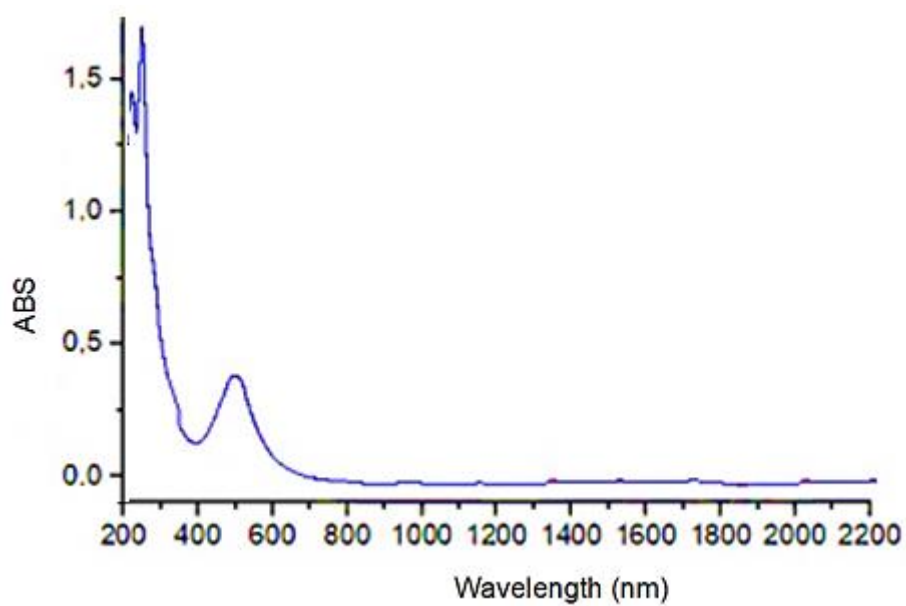

**Fig. S2** UV/Vis/NIR absorption spectrum of [(Fe(cyclam))<sub>2</sub>Qz]Cl(PF<sub>6</sub>)<sub>3</sub> complex in CH<sub>3</sub>CN.

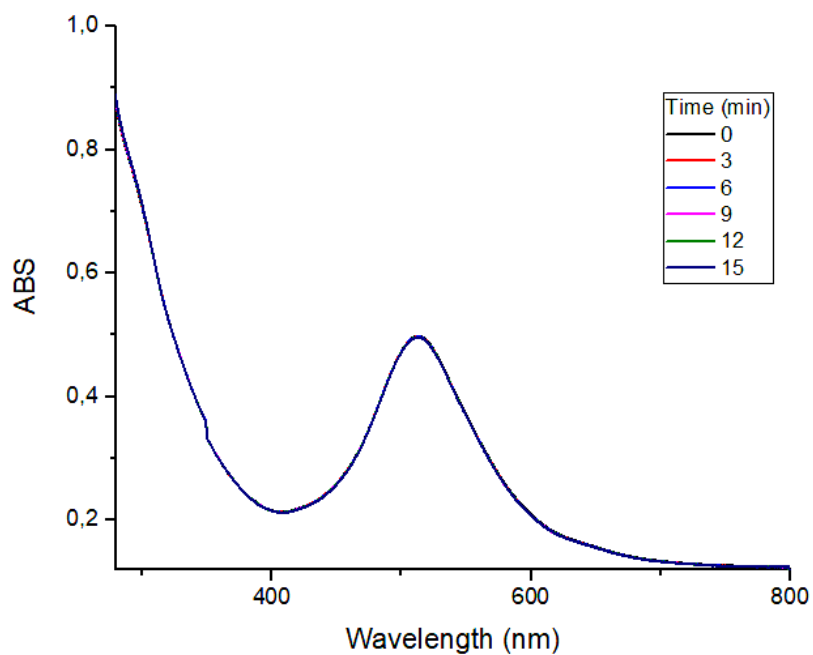

**Fig. S3** UV/Vis/NIR spectroelectrochemical response of  $[(\text{Fe}(\text{cyclam}))_2\text{Qz}]\text{Cl}(\text{PF}_6)_3$  upon application of a positive potential (+1000 mV) for 36 minutes in  $\text{CH}_3\text{CN}/0.1 \text{ M Bu}_4\text{NPF}_6$ .

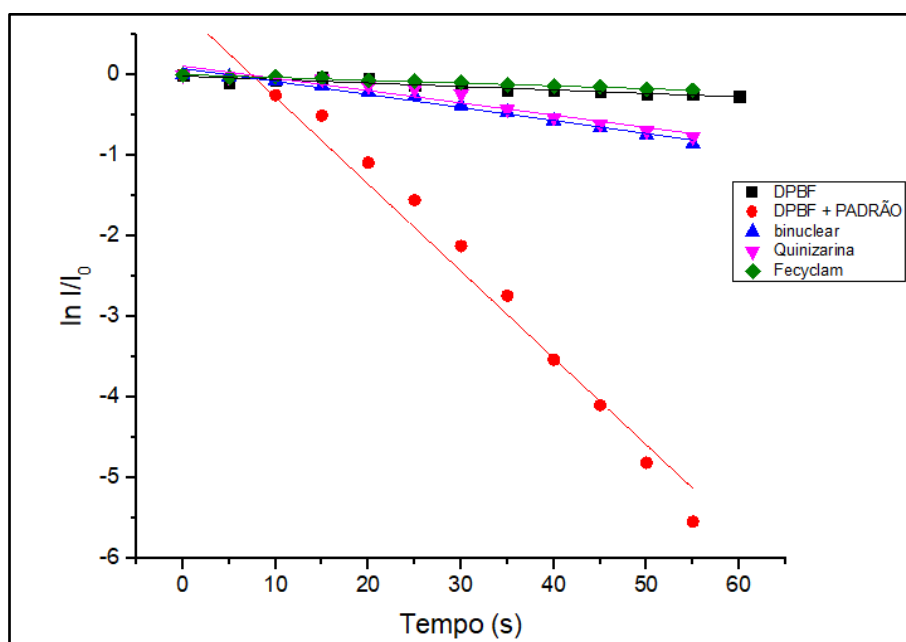

**Fig. S4** DPBF consumption (at  $20 \mu\text{mol L}^{-1}$ ) as a function of the irradiation time (blue LED) in an air-equilibrated methanol solution, with and without  $[(\text{Fe}(\text{cyclam}))_2\text{Qz}]\text{Cl}(\text{PF}_6)_3$ , quinizarin and *cis*- $[\text{Fe}(\text{cyclam})\text{Cl}_2]\text{Cl}$ , as indicated ( $\lambda_{\text{ex}} = 409 \text{ nm}$ ,  $\lambda_{\text{em}} = 460 \text{ nm}$ ).

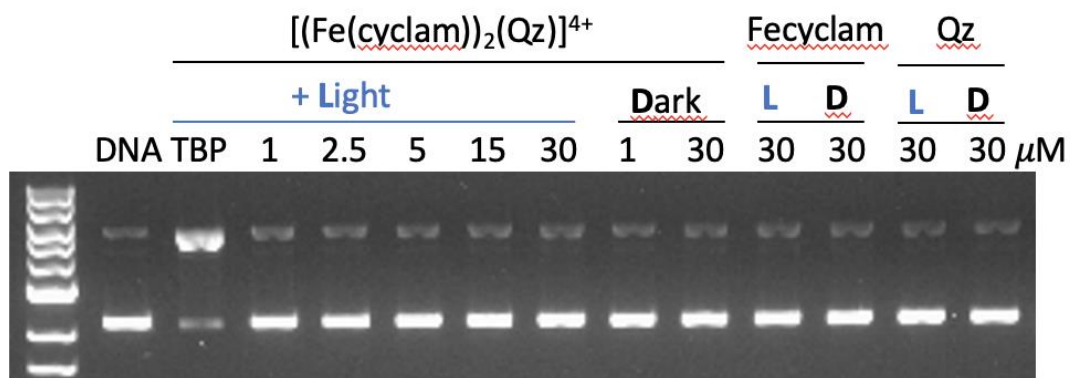

Fig. S5. DNA photocleavage assay. Note that TBP is  $[\text{Ru}(\text{bpy})_3]\text{Cl}_2$  (used at  $30 \mu\text{mol L}^{-1}$ ) and Fecyclam is the precursor metal complex  $([\text{Fe}(\text{cyclam})\text{Cl}_2]\text{Cl})$ . Samples were kept in the dark (D) or irradiated with blue light (L).

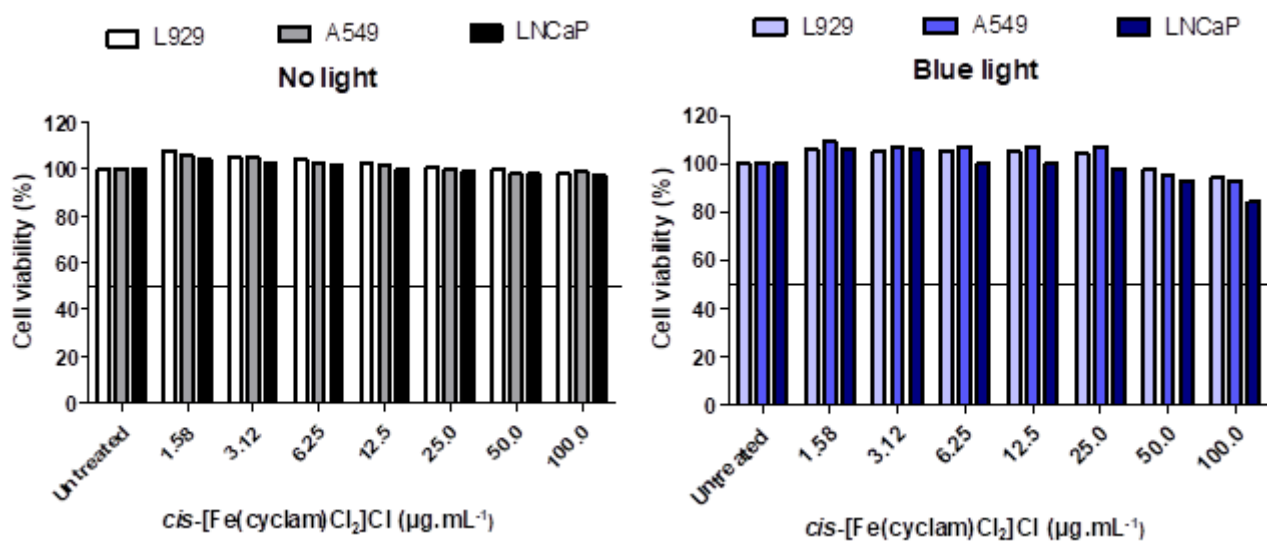

Fig. S6 *cis*- $[\text{Fe}(\text{cyclam})\text{Cl}_2]\text{Cl}$  does not reduce viability of A549 and L929 cell lines, even after irradiation with blue LED ( $\lambda_{\text{irr}} = 453 \text{ nm}$ ).
